# Supplementary material
Source: publisher site journal article supplement (https://www.spandidos-publications.com/5515/downloadSupplementary)

Figure S1. Results of cell transfection. (A) Expression of miR-382-5p in chondrocytes transfected with miR-382-5p mimic and appropriate negative control (miR-NC). (B) Expression of miR-382-5p in chondrocytes transfected with miR-382-5p inhibitor (inhib-miR-382-5p) and appropriate negative control (inhib-NC). (C) Expression of circ0072568 in chondrocytes transfected with oe-circ0072568 and appropriate negative control (oe-NC). (D) Expression of circ0072568 in chondrocytes transfected with circ0072568 siRNA (si-circ0072568) and appropriate negative control (si-nc).

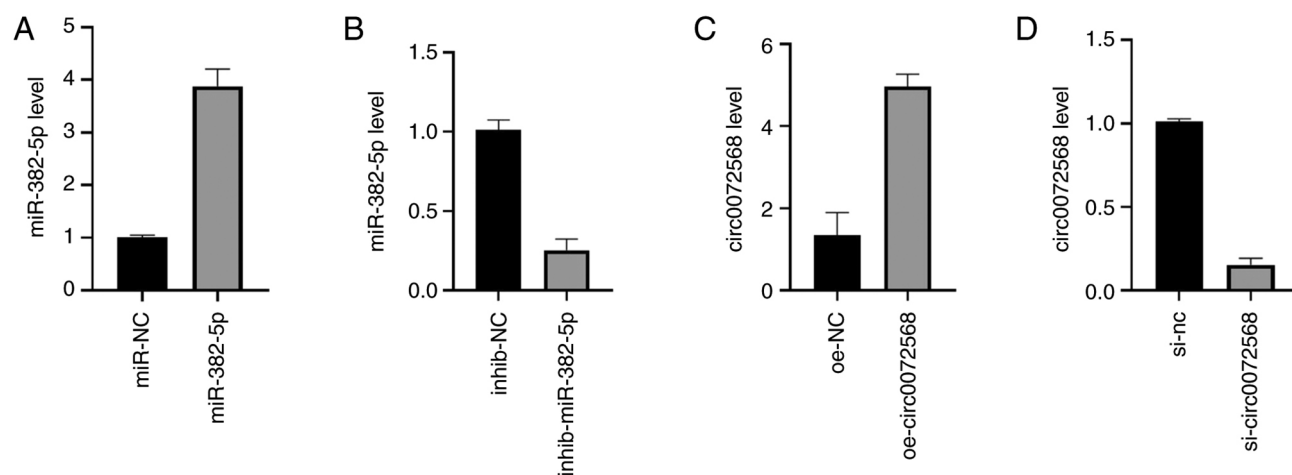

Supplement: Supplementary file 1 [file downloadSupplementary]
